# Supplementary material for: Influence of an adjuvant antidepressant on the efficacy of electroconvulsive therapy: A systematic review and meta-analysis
Source: PubMed Central journal article supplement — Aust N Z J Psychiatry. 2020 Sep 8;55(4):366–80. doi: 10.1177/0004867420952543 (PMC8020309; doi:10.1177/0004867420952543), 2020-09-08
Supplement: Supplementary_Table_1_Search_strategy_per_database.pdf [file Supplementary_Table_1_Search_strategy_per_database.pdf]

**Supplementary Table 1.** Search strategy per database

| Database | Search strategy                                                                                                                                                                                                                                                                                                                                                                                                                                                                                                                                                                                                                                                                                                                                                                                                                                                                                                                                                                                                                                                                                                                                                                                                                                                                                                                                                               |
|----------|-------------------------------------------------------------------------------------------------------------------------------------------------------------------------------------------------------------------------------------------------------------------------------------------------------------------------------------------------------------------------------------------------------------------------------------------------------------------------------------------------------------------------------------------------------------------------------------------------------------------------------------------------------------------------------------------------------------------------------------------------------------------------------------------------------------------------------------------------------------------------------------------------------------------------------------------------------------------------------------------------------------------------------------------------------------------------------------------------------------------------------------------------------------------------------------------------------------------------------------------------------------------------------------------------------------------------------------------------------------------------------|
| Embase   | <p>( 'electroconvulsive therapy'/exp OR 'electroconvulsive therapy unit'/de OR 'electric shock'/de OR (electroconvulsi* OR electr*-convulsi* OR electroshock OR (electr* NEAR/3 shock) OR ect OR spECTrum-5000Q OR Thymatron):ab,ti) AND ('depression'/exp OR 'antidepressant agent'/exp OR (depress* OR antidepress*):ab,ti) AND ('drug therapy'/de OR 'drug therapy':lnk OR 'antidepressant agent'/exp OR 'serotonin uptake inhibitor'/exp OR 'serotonin noradrenalin reuptake inhibitor'/exp OR 'lithium'/de OR 'psychotropic agent'/de OR (drug OR antidepress* OR anti-depress* OR (pharmaco* NEAR/3 (therap* OR treat)) OR pharmaco* OR Psychopharmaco* OR (serotonin NEAR/3 (uptake OR reuptake) NEAR/3 inhibitor*) OR ssri OR ssri OR venlafaxine OR lithium OR psychotropic*):ab,ti) AND ('Controlled clinical trial'/exp OR 'Crossover procedure'/de OR 'Double-blind procedure'/de OR 'Single-blind procedure'/de OR 'cohort analysis'/de OR 'longitudinal study'/de OR 'prospective study'/de OR 'retrospective study'/de OR (random* OR factorial* OR crossover* OR (cross NEXT/1 over*) OR placebo* OR ((doubl* OR singl*) NEXT/1 blind*) OR assign* OR allocat* OR volunteer* OR trial OR groups OR cohort OR longitudinal* OR prospectiv* OR retrospectiv*):ab,ti) NOT ([animals]/lim NOT [humans]/lim) NOT ('case report'/de OR 'case report':ab,ti) NOT</p> |

|                  |                                                                                                                                                                                                                                                                                                                                                                                                                                                                                                                                                                                                                                                                                                                                                                                                                                                                                                                                                                                                                                                                                                                                                                                                                                 |
|------------------|---------------------------------------------------------------------------------------------------------------------------------------------------------------------------------------------------------------------------------------------------------------------------------------------------------------------------------------------------------------------------------------------------------------------------------------------------------------------------------------------------------------------------------------------------------------------------------------------------------------------------------------------------------------------------------------------------------------------------------------------------------------------------------------------------------------------------------------------------------------------------------------------------------------------------------------------------------------------------------------------------------------------------------------------------------------------------------------------------------------------------------------------------------------------------------------------------------------------------------|
|                  | <p>[[Conference Abstract]/lim OR [Letter]/lim OR [Note]/lim OR [Editorial]/lim) AND [english]/lim</p>                                                                                                                                                                                                                                                                                                                                                                                                                                                                                                                                                                                                                                                                                                                                                                                                                                                                                                                                                                                                                                                                                                                           |
| Medline Ovid     | <p>(Electroconvulsive Therapy/ OR (electroconvulsi* OR electr*-convulsi* OR electroshock OR (electr* ADJ3 shock) OR ect OR spECTrum-5000Q OR Thymatron).ab,ti.) AND (depression/ OR exp Depressive Disorder/ OR exp Antidepressive Agents/ OR (depress* OR antidepress*).ab,ti.) AND (drug therapy/ OR drug therapy.xs. OR exp Antidepressive Agents/ OR exp Serotonin Uptake Inhibitors/ OR lithium/ OR exp Psychotropic Drugs/ OR (drug OR antidepress* OR anti-depress* OR (pharmaco* ADJ3 (therap* OR treat)) OR pharmaco* OR Psychopharmaco* OR (serotonin ADJ3 (uptake OR reuptake) ADJ3 inhibitor*) OR ssri OR ssri OR venlafaxine OR lithium OR psychotropic*).ab,ti.) AND (Exp Controlled clinical trial/ OR "Double-Blind Method"/ OR "Single-Blind Method"/ OR "Random Allocation"/ OR exp Cohort Studies/ OR (random* OR factorial* OR crossover* OR cross over* OR placebo* OR ((doubl* OR singl*) ADJ blind*) OR assign* OR allocat* OR volunteer* OR trial OR groups OR cohort OR longitudinal* OR prospectiv* OR retrospectiv*).ab,ti.) NOT (exp animals/ NOT humans/) NOT (case report/ OR case report.ab,ti.) NOT (letter OR news OR comment OR editorial OR congresses OR abstracts).pt. AND english.la.</p> |
| PsycINFO<br>Ovid | <p>(Electroconvulsive Shock Therapy/ OR (electroconvulsi* OR electr*-convulsi* OR electroshock OR (electr* ADJ3 shock) OR ect OR spECTrum-5000Q OR Thymatron).ab,ti.) AND ("depression</p>                                                                                                                                                                                                                                                                                                                                                                                                                                                                                                                                                                                                                                                                                                                                                                                                                                                                                                                                                                                                                                      |

|                     |                                                                                                                                                                                                                                                                                                                                                                                                                                                                                                                                                                                                                                                                                                                                                                                                                                                                                                                                  |
|---------------------|----------------------------------------------------------------------------------------------------------------------------------------------------------------------------------------------------------------------------------------------------------------------------------------------------------------------------------------------------------------------------------------------------------------------------------------------------------------------------------------------------------------------------------------------------------------------------------------------------------------------------------------------------------------------------------------------------------------------------------------------------------------------------------------------------------------------------------------------------------------------------------------------------------------------------------|
|                     | <p>(emotion)"/ OR exp Major Depression/ OR exp Antidepressant<br/> Drugs/ OR (depress* OR antidepress*).ab,ti.) AND (drug therapy/ OR<br/> exp Antidepressant Drugs/ OR exp Serotonin Reuptake Inhibitors/<br/> OR lithium/ OR (drug OR antidepress* OR anti-depress* OR<br/> (pharmaco* ADJ3 (therap* OR treat)) OR pharmaco* OR<br/> Psychopharmaco* OR (serotonin ADJ3 (uptake OR reuptake) ADJ3<br/> inhibitor*) OR ssri OR ssri OR venlafaxine OR lithium OR<br/> psychotropic*).ab,ti.) AND ((random* OR factorial* OR crossover* OR<br/> cross over* OR placebo* OR ((doubl* OR singl*) ADJ blind*) OR<br/> assign* OR allocat* OR volunteer* OR trial OR groups OR cohort OR<br/> longitudinal* OR prospectiv* OR retrospectiv*).ab,ti.) NOT (exp<br/> animals/ NOT humans/) NOT (case report.ab,ti.) NOT (letter OR news<br/> OR comment OR editorial OR congresses OR abstracts OR books).pt.<br/> AND english.la.</p> |
| Cochrane<br>Central | <p>((electroconvulsi* OR (electr* NEXT/1 convulsi*) OR electroshock OR<br/> (electr* NEAR/3 shock) OR ect OR spECTrum-5000Q OR<br/> Thymatron):ab,ti) AND ((depress* OR antidepress*):ab,ti) AND<br/> ((drug OR antidepress* OR anti-depress* OR (pharmaco* NEAR/3<br/> (therap* OR treat)) OR pharmaco* OR Psychopharmaco* OR<br/> (serotonin NEAR/3 (uptake OR reuptake) NEAR/3 inhibitor*) OR ssri<br/> OR ssri OR venlafaxine OR lithium OR psychotropic*):ab,ti)</p>                                                                                                                                                                                                                                                                                                                                                                                                                                                        |
| Web of<br>Science   | <p>TS=(((electroconvulsi* OR electr*-convulsi* OR electroshock OR<br/> (electr* NEAR/2 shock) OR ect OR spECTrum-5000Q OR<br/> Thymatron)) AND ((depress* OR antidepress*)) AND ((drug OR</p>                                                                                                                                                                                                                                                                                                                                                                                                                                                                                                                                                                                                                                                                                                                                    |

|                           |                                                                                                                                                                                                                                                                                                                                                                                                                                                                                                                                                                                                                                                                                                                                                                                                                                                                                                                      |
|---------------------------|----------------------------------------------------------------------------------------------------------------------------------------------------------------------------------------------------------------------------------------------------------------------------------------------------------------------------------------------------------------------------------------------------------------------------------------------------------------------------------------------------------------------------------------------------------------------------------------------------------------------------------------------------------------------------------------------------------------------------------------------------------------------------------------------------------------------------------------------------------------------------------------------------------------------|
|                           | <p>antidepress* OR anti-depress* OR (pharmaco* NEAR/2 (therap* OR treat)) OR pharmaco* OR Psychopharmaco* OR (serotonin NEAR/2 (uptake OR reuptake) NEAR/2 inhibitor*) OR ssri OR ssri OR venlafaxine OR lithium OR psychotropic*) AND ((random* OR factorial* OR crossover* OR (cross NEAR/1 over*) OR placebo* OR ((doubl* OR singl*) NEAR/1 blind*) OR assign* OR allocat* OR volunteer* OR trial OR groups OR cohort OR longitudinal* OR prospectiv* OR retrospectiv*)) NOT ("case report") NOT ((animal* OR rat OR rats OR mouse OR mice OR murine OR dog OR dogs OR canine OR cat OR cats OR feline OR rabbit OR cow OR cows OR bovine OR rodent* OR sheep OR ovine OR pig OR swine OR porcine OR veterinar* OR chick* OR zebrafish* OR baboon* OR nonhuman* OR primate* OR cattle* OR goose OR geese OR duck OR macaque* OR avian* OR bird*) NOT (human* OR patient*)) AND DT=(article ) AND LA=(english)</p> |
| <p>Google<br/>Scholar</p> | <p>electroconvulsion electroconvulsive electroshock "spECTrum-5000Q" Thymatron depression depressive antidepressive drug antidepressve  pharmacotherapy  Psychopharmacology "serotonin uptake reuptake inhibitors inhibitor" psychotropics intitle:trial randomized rct</p>                                                                                                                                                                                                                                                                                                                                                                                                                                                                                                                                                                                                                                          |
